# Supplementary material
Source: publisher site journal article supplement (https://www.spandidos-publications.com/4179/downloadSupplementary)
Supplement: Supplementary file 1 [file downloadSupplementary]

## Sheet: TableS10-hub_circRNA
Table SX. The detail circRNAs to construct ceRNA.
gene_names	UP_DOWN
hsa_circRNA_000200	Down
hsa_circRNA_001241	Down
hsa_circRNA_101525	Down
hsa_circRNA_102082	Down
hsa_circRNA_103801	Down
hsa_circRNA_104315	Down
hsa_circRNA_104513	Down
hsa_circRNA_100089	Up
hsa_circRNA_101539	Up
hsa_circRNA_102956	Up
